# Supplementary material
Source: publisher figshare collection journal article supplement (https://acs.figshare.com/ndownloader/files/5692956)
Supplement: Supplementary file 1 [file 5692956]

# ic011210v.cif 

# 1. SUBMISSION DETAILS

_publ_contact_autor
;
    'Prof. Dr. W. Kaim'
    'Institut f\"ur Anorganische Chemie'
    'Universit\"at Stuttgart'
    'Pfaffenwaldring 55'
    'D-70550 Stuttgart'
    'Germany'
;
_publ_contact_author_phone      '049 711 685-4240'
_publ_contact_author_fax        '049 711 685-4165'
_publ_contact_author_email      'kaim@iac.uni-stuttgart.de'
_publ_requested_journal         'Inorg. Chem.'
_publ_requested_coeditor_name   'Sandip Dey, Vimal K. Jain, Axel 
Knoedler, Axel Klein, Stanislav Zalis'

_publ_contact_letter

#===================================================================== 


# 2. TITLE AND AUTHOR LIST

_publ_section_title 'Structural Basis for Unusually Long-Wavelength 
Charge Transfer Transitions in Complexes
                      [MCl(ECH2CH2NMe2)(PR3)] (E = Te, Se; M = Pt, 
Pd): Experimental Results and TD-DFT Calculations'
loop_
_publ_author_name
_publ_author_address

     'Jain, Vimal K.'
     'DAE'
     'BARC, Novel Materials & Structural Chemistry Division'
     'Trombay'
     '400 085 Mumbai'
     'India'

     'Dey, Sandip'
     'DAE'
     'BARC, Novel Materials & Structural Chemistry Division'
     'Trombay'
     '400 085 Mumbai'
     'India'

     'Zalis, Stanislav'
     'J. Heyrovsky Institute of Physical Chemistry'
     'Academy of Sciences of the Czech Republic'
     'Dolejskova 3'
     'CZ-18223 Prague'
     'Czech Republic'
;
     'Klein, Axel'
     'Institut f\"ur Anorganische Chemie'
     'Universit\"at Stuttgart'
     'Pfaffenwaldring 55'
     'D-70550 Stuttgart'
     'Germany'
;
     'Knoedler, Axel'
     'Institut f\"ur Anorganische Chemie'
     'Universit\"at Stuttgart'
     'Pfaffenwaldring 55'
     'D-70550 Stuttgart'
     'Germany'
;
     'Kaim, Wolfgang'
     'Institut f\"ur Anorganische Chemie'
     'Universit\"at Stuttgart'
     'Pfaffenwaldring 55'
     'D-70550 Stuttgart'
     'Germany'

#===================================================================== 

data_patt
 
_audit_creation_method            SHELXL-97
_chemical_name_systematic
_chemical_name_common 
'Dimethylaminoethyltellurolato-chloro-(tris(n-propyl)phophine)palladiu 
m(II)'
_chemical_melting_point           ?
_chemical_formula_moiety          ?
_chemical_formula_sum            'C13 H31 Cl N P Pd Te'
_chemical_formula_weight          501.81
 

 
loop_
  _atom_type_symbol
  _atom_type_description
  _atom_type_scat_dispersion_real
  _atom_type_scat_dispersion_imag
  _atom_type_scat_source
  'C'  'C'   0.0033   0.0016
  'International Tables Vol C Tables 4.2.6.8 and 6.1.1.4'
  'H'  'H'   0.0000   0.0000
  'International Tables Vol C Tables 4.2.6.8 and 6.1.1.4'
  'N'  'N'   0.0061   0.0033
  'International Tables Vol C Tables 4.2.6.8 and 6.1.1.4'
  'P'  'P'   0.1023   0.0942
  'International Tables Vol C Tables 4.2.6.8 and 6.1.1.4'
  'Cl'  'Cl'   0.1484   0.1585
  'International Tables Vol C Tables 4.2.6.8 and 6.1.1.4'
  'Pd'  'Pd'  -0.9988   1.0072
  'International Tables Vol C Tables 4.2.6.8 and 6.1.1.4'
  'Te'  'Te'  -0.5308   1.6751
  'International Tables Vol C Tables 4.2.6.8 and 6.1.1.4'
 
symmetry_cell_setting            triclinic
symmetry_space_group_name_H-M    P-1
 
loop_
  _symmetry_equiv_pos_as_xyz
  'x, y, z'
  '-x, -y, -z'
 
_cell_length_a                    8.413(2)
_cell_length_b                    10.709(3)
_cell_length_c                    11.406(3)
_cell_angle_alpha                 74.096(17)
_cell_angle_beta                  85.768(18)
_cell_angle_gamma                 72.795(19)
_cell_volume                      944.1(4)
_cell_formula_units_Z             2
_cell_measurement_temperature     173(2)
_cell_measurement_reflns_used     ?
_cell_measurement_theta_min       ?
_cell_measurement_theta_max       ?
 
_exptl_crystal_description        'plate'
_exptl_crystal_colour             'red'
_exptl_crystal_size_max           0.5
_exptl_crystal_size_mid           0.3
_exptl_crystal_size_min           0.3
_exptl_crystal_density_meas       ?
_exptl_crystal_density_diffrn     1.765
_exptl_crystal_density_method     'not measured'
_exptl_crystal_F_000              492
_exptl_absorpt_coefficient_mu     2.711
_exptl_absorpt_correction_type    'psi-scans'
_exptl_absorpt_correction_T_min   0.51191
_exptl_absorpt_correction_T_max   0.79712
_exptl_absorpt_process_details    'lamina 0 1 1'
 
_exptl_special_details
 
_diffrn_ambient_temperature       173(2)
_diffrn_radiation_wavelength      0.71073
_diffrn_radiation_type            MoK\a
_diffrn_radiation_source          'fine-focus sealed tube'
_diffrn_radiation_monochromator   graphite
_diffrn_measurement_device_type   'Siemens P4'
_diffrn_measurement_method        '\w scans'
_diffrn_detector_area_resol_mean  ?
_diffrn_standards_number          ?
_diffrn_standards_interval_count  ?
_diffrn_standards_interval_time   ?
_diffrn_standards_decay_%         ?
_diffrn_reflns_number             5536
_diffrn_reflns_av_R_equivalents   0.0304
_diffrn_reflns_av_sigmaI/netI     0.0352
_diffrn_reflns_limit_h_min        -1
_diffrn_reflns_limit_h_max        11
_diffrn_reflns_limit_k_min        -14
_diffrn_reflns_limit_k_max        14
_diffrn_reflns_limit_l_min        -16
_diffrn_reflns_limit_l_max        16
_diffrn_reflns_theta_min          2.06
_diffrn_reflns_theta_max          30.00
_reflns_number_total              4663
_reflns_number_gt                 3933
_reflns_threshold_expression      >2sigma(I)
 
_computing_data_collection        'Siemens XSCANS'
_computing_cell_refinement        'Siemens XSCANS'
_computing_data_reduction         'Siemens SHELXTL'
_computing_structure_solution     'SHELXS-97 (Sheldrick, 1990)'
_computing_structure_refinement   'SHELXL-97 (Sheldrick, 1997)'
_computing_molecular_graphics     'Siemens SHELXTL'
_computing_publication_material   'Siemens SHELXTL'
 
_refine_special_details
;
  Refinement of F^2^ against ALL reflections.  The weighted R-factor wR and
  goodness of fit S are based on F^2^, conventional R-factors R are based
  on F, with F set to zero for negative F^2^. The threshold expression of
  F^2^ > 2sigma(F^2^) is used only for calculating R-factors(gt) etc. and is
  not relevant to the choice of reflections for refinement.  R-factors based
  on F^2^ are statistically about twice as large as those based on F, and R-
  factors based on ALL data will be even larger.
;
 
_refine_ls_structure_factor_coef  Fsqd
_refine_ls_matrix_type            full
_refine_ls_weighting_scheme       calc
_refine_ls_weighting_details
  'calc w=1/[\s^2^(Fo^2^)+(0.0329P)^2^+1.7976P] where P=(Fo^2^+2Fc^2^)/3'
_atom_sites_solution_primary      direct
_atom_sites_solution_secondary    difmap
_atom_sites_solution_hydrogens    geom
_refine_ls_hydrogen_treatment     mixed
_refine_ls_extinction_method      none
_refine_ls_extinction_coef        ?
_refine_ls_number_reflns          4663
_refine_ls_number_parameters      163
_refine_ls_number_restraints      0
_refine_ls_R_factor_all           0.0430
_refine_ls_R_factor_gt            0.0332
_refine_ls_wR_factor_ref          0.0850
_refine_ls_wR_factor_gt           0.0799
_refine_ls_goodness_of_fit_ref    1.023
_refine_ls_restrained_S_all       1.023
_refine_ls_shift/su_max           0.000
_refine_ls_shift/su_mean          0.000
 
loop_
  _atom_site_label
  _atom_site_type_symbol
  _atom_site_fract_x
  _atom_site_fract_y
  _atom_site_fract_z
  _atom_site_U_iso_or_equiv
  _atom_site_adp_type
  _atom_site_occupancy
  _atom_site_symmetry_multiplicity
  _atom_site_calc_flag
  _atom_site_refinement_flags
  _atom_site_disorder_assembly
  _atom_site_disorder_group
Pd1 Pd 0.17038(3) 0.26821(2) 0.24086(2) 0.02146(7) Uani 1 1 d . . .
Te1 Te 0.42743(3) 0.09821(3) 0.19464(2) 0.03249(8) Uani 1 1 d . . .
Cl1 Cl -0.06901(13) 0.43967(10) 0.27311(9) 0.0381(2) Uani 1 1 d . . .
P1 P 0.31169(12) 0.32472(9) 0.36612(8) 0.02471(18) Uani 1 1 d . . .
N1 N 0.0355(4) 0.2134(3) 0.1170(3) 0.0285(6) Uani 1 1 d . . .
C31 C 0.2074(5) 0.3272(4) 0.5107(3) 0.0289(7) Uani 1 1 d . . .
H31A H 0.2611 0.3713 0.5555 0.035 Uiso 1 1 calc R . .
H31B H 0.0902 0.3829 0.4948 0.035 Uiso 1 1 calc R . .
C21 C 0.5251(5) 0.2229(4) 0.4094(3) 0.0307(7) Uani 1 1 d . . .
H21A H 0.5248 0.1278 0.4459 0.037 Uiso 1 1 calc R . .
H21B H 0.5925 0.2250 0.3344 0.037 Uiso 1 1 calc R . .
C32 C 0.2104(5) 0.1881(4) 0.5905(3) 0.0294(7) Uani 1 1 d . . .
H32A H 0.3266 0.1290 0.6001 0.035 Uiso 1 1 calc R . .
H32B H 0.1458 0.1475 0.5503 0.035 Uiso 1 1 calc R . .
C1 C 0.3004(6) 0.0681(5) 0.0538(5) 0.0468(11) Uani 1 1 d . . .
H1A H 0.3066 0.1361 -0.0239 0.056 Uiso 1 1 calc R . .
H1B H 0.3538 -0.0233 0.0420 0.056 Uiso 1 1 calc R . .
C41 C 0.3257(6) 0.4968(4) 0.3043(4) 0.0395(10) Uani 1 1 d . . .
H41A H 0.2118 0.5590 0.2863 0.047 Uiso 1 1 calc R . .
H41B H 0.3744 0.5225 0.3675 0.047 Uiso 1 1 calc R . .
C2 C 0.1275(6) 0.0814(5) 0.0880(5) 0.0448(10) Uani 1 1 d . . .
H2A H 0.1235 0.0059 0.1602 0.054 Uiso 1 1 calc R . .
H2B H 0.0685 0.0718 0.0204 0.054 Uiso 1 1 calc R . .
C3 C -0.1212(6) 0.1935(6) 0.1697(5) 0.0518(12) Uani 1 1 d . . .
H3A H -0.1794 0.1689 0.1120 0.078 Uiso 1 1 calc R . .
H3B H -0.1908 0.2776 0.1869 0.078 Uiso 1 1 calc R . .
H3C H -0.0989 0.1207 0.2456 0.078 Uiso 1 1 calc R . .
C22 C 0.6107(6) 0.2658(6) 0.4984(5) 0.0494(12) Uani 1 1 d . . .
H22A H 0.6170 0.3593 0.4616 0.059 Uiso 1 1 calc R . .
H22B H 0.5439 0.2656 0.5736 0.059 Uiso 1 1 calc R . .
C4 C 0.0036(8) 0.3230(5) 0.0061(4) 0.0546(14) Uani 1 1 d . . .
H4A H -0.0574 0.3014 -0.0521 0.082 Uiso 1 1 calc R . .
H4B H 0.1095 0.3347 -0.0297 0.082 Uiso 1 1 calc R . .
H4C H -0.0630 0.4070 0.0250 0.082 Uiso 1 1 calc R . .
C42 C 0.4292(7) 0.5172(5) 0.1892(5) 0.0535(13) Uani 1 1 d . . .
H42A H 0.3772 0.4983 0.1233 0.064 Uiso 1 1 calc R . .
H42B H 0.5421 0.4529 0.2048 0.064 Uiso 1 1 calc R . .
C43 C 0.4414(9) 0.6618(6) 0.1489(6) 0.072(2) Uani 1 1 d . . .
H43A H 0.5083 0.6733 0.0748 0.108 Uiso 1 1 calc R . .
H43C H 0.4942 0.6800 0.2138 0.108 Uiso 1 1 calc R . .
H43D H 0.3296 0.7253 0.1324 0.108 Uiso 1 1 calc R . .
C33 C 0.1377(6) 0.1945(4) 0.7156(3) 0.0379(9) Uani 1 1 d . . .
H33C H 0.1415 0.1028 0.7648 0.057 Uiso 1 1 calc R . .
H33D H 0.0219 0.2515 0.7064 0.057 Uiso 1 1 calc R . .
H33A H 0.2027 0.2330 0.7562 0.057 Uiso 1 1 calc R . .
C23 C 0.7827(6) 0.1724(7) 0.5303(5) 0.0577(15) Uani 1 1 d . . .
H23C H 0.8345 0.2025 0.5876 0.087 Uiso 1 1 calc R . .
H23D H 0.8496 0.1736 0.4561 0.087 Uiso 1 1 calc R . .
H23A H 0.7765 0.0800 0.5681 0.087 Uiso 1 1 calc R . .
 
loop_
  _atom_site_aniso_label
  _atom_site_aniso_U_11
  _atom_site_aniso_U_22
  _atom_site_aniso_U_33
  _atom_site_aniso_U_23
  _atom_site_aniso_U_13
  _atom_site_aniso_U_12
Pd1 0.02460(12) 0.02309(12) 0.01935(11) -0.00838(8) 0.00102(9) -0.00845(9)
Te1 0.03042(13) 0.03552(14) 0.03270(13) -0.01810(10) -0.00172(10) -0.00241(10)
Cl1 0.0353(5) 0.0355(5) 0.0405(5) -0.0162(4) -0.0005(4) 0.0000(4)
P1 0.0328(4) 0.0234(4) 0.0207(4) -0.0080(3) -0.0018(3) -0.0097(3)
N1 0.0282(15) 0.0332(15) 0.0301(15) -0.0131(12) -0.0013(12) -0.0130(13)
C31 0.041(2) 0.0245(16) 0.0213(15) -0.0098(12) -0.0029(14) -0.0053(14)
C21 0.0328(18) 0.041(2) 0.0246(16) -0.0117(14) -0.0026(14) -0.0163(16)
C32 0.0318(18) 0.0300(17) 0.0263(16) -0.0100(13) 0.0018(14) -0.0068(14)
C1 0.046(3) 0.053(3) 0.051(3) -0.035(2) -0.006(2) -0.008(2)
C41 0.061(3) 0.0272(18) 0.036(2) -0.0049(15) -0.0058(19) -0.0218(19)
C2 0.047(3) 0.048(3) 0.052(3) -0.026(2) -0.002(2) -0.019(2)
C3 0.039(2) 0.073(3) 0.063(3) -0.035(3) 0.016(2) -0.035(2)
C22 0.045(3) 0.069(3) 0.047(3) -0.022(2) -0.010(2) -0.026(2)
C4 0.082(4) 0.049(3) 0.037(2) -0.002(2) -0.020(2) -0.029(3)
C42 0.071(3) 0.042(2) 0.047(3) 0.002(2) 0.001(2) -0.029(2)
C43 0.106(5) 0.059(3) 0.061(3) 0.009(3) -0.010(3) -0.058(4)
C33 0.048(2) 0.040(2) 0.0253(17) -0.0089(15) 0.0037(16) -0.0120(18)
C23 0.044(3) 0.092(4) 0.043(2) -0.008(3) -0.010(2) -0.033(3)
 
_geom_special_details
;
  All esds (except the esd in the dihedral angle between two l.s. planes)
  are estimated using the full covariance matrix.  The cell esds are taken
  into account individually in the estimation of esds in distances, angles
  and torsion angles; correlations between esds in cell parameters are only
  used when they are defined by crystal symmetry.  An approximate (isotropic)
  treatment of cell esds is used for estimating esds involving l.s. planes.
;
 
loop_
  _geom_bond_atom_site_label_1
  _geom_bond_atom_site_label_2
  _geom_bond_distance
  _geom_bond_site_symmetry_2
  _geom_bond_publ_flag
Pd1 N1 2.172(3) . ?
Pd1 P1 2.2295(11) . ?
Pd1 Cl1 2.3740(12) . ?
Pd1 Te1 2.5095(8) . ?
Te1 C1 2.137(5) . ?
P1 C31 1.813(4) . ?
P1 C41 1.820(4) . ?
P1 C21 1.826(4) . ?
N1 C4 1.449(5) . ?
N1 C3 1.457(5) . ?
N1 C2 1.509(6) . ?
C31 C32 1.512(5) . ?
C21 C22 1.523(6) . ?
C32 C33 1.522(5) . ?
C1 C2 1.453(7) . ?
C41 C42 1.522(7) . ?
C22 C23 1.500(7) . ?
C42 C43 1.523(7) . ?
 
loop_
  _geom_angle_atom_site_label_1
  _geom_angle_atom_site_label_2
  _geom_angle_atom_site_label_3
  _geom_angle
  _geom_angle_site_symmetry_1
  _geom_angle_site_symmetry_3
  _geom_angle_publ_flag
N1 Pd1 P1 179.19(8) . . ?
N1 Pd1 Cl1 91.89(9) . . ?
P1 Pd1 Cl1 88.62(4) . . ?
N1 Pd1 Te1 87.85(9) . . ?
P1 Pd1 Te1 91.59(3) . . ?
Cl1 Pd1 Te1 176.22(3) . . ?
C1 Te1 Pd1 91.35(13) . . ?
C31 P1 C41 104.1(2) . . ?
C31 P1 C21 103.90(18) . . ?
C41 P1 C21 104.5(2) . . ?
C31 P1 Pd1 112.07(14) . . ?
C41 P1 Pd1 111.29(15) . . ?
C21 P1 Pd1 119.51(14) . . ?
C4 N1 C3 109.9(4) . . ?
C4 N1 C2 110.1(4) . . ?
C3 N1 C2 104.9(3) . . ?
C4 N1 Pd1 107.3(3) . . ?
C3 N1 Pd1 111.2(3) . . ?
C2 N1 Pd1 113.5(3) . . ?
C32 C31 P1 113.7(3) . . ?
C22 C21 P1 116.1(3) . . ?
C31 C32 C33 111.6(3) . . ?
C2 C1 Te1 109.2(3) . . ?
C42 C41 P1 114.5(3) . . ?
C1 C2 N1 114.9(4) . . ?
C23 C22 C21 111.4(5) . . ?
C41 C42 C43 110.5(5) . . ?
 
_diffrn_measured_fraction_theta_max    0.851
_diffrn_reflns_theta_full              30.00
_diffrn_measured_fraction_theta_full   0.851
_refine_diff_density_max    0.925
_refine_diff_density_min   -0.736
_refine_diff_density_rms    0.111

#===================================================================== 

data_kno19
 
_audit_creation_method            SHELXL-97
_chemical_name_systematic
;
  ?
;
_chemical_name_common             Diphenylmethylphosphine chloro 
2(N,N-dimethylamino)ethyltellurato palladium(II)
_chemical_melting_point           ?
_chemical_formula_moiety          ?
_chemical_formula_sum            'C17 H23 Cl N P Pd Te'
_chemical_formula_weight          541.78
 
loop_
  _atom_type_symbol
  _atom_type_description
  _atom_type_scat_dispersion_real
  _atom_type_scat_dispersion_imag
  _atom_type_scat_source
  'C'  'C'   0.0033   0.0016
  'International Tables Vol C Tables 4.2.6.8 and 6.1.1.4'
  'H'  'H'   0.0000   0.0000
  'International Tables Vol C Tables 4.2.6.8 and 6.1.1.4'
  'N'  'N'   0.0061   0.0033
  'International Tables Vol C Tables 4.2.6.8 and 6.1.1.4'
  'P'  'P'   0.1023   0.0942
  'International Tables Vol C Tables 4.2.6.8 and 6.1.1.4'
  'Cl'  'Cl'   0.1484   0.1585
  'International Tables Vol C Tables 4.2.6.8 and 6.1.1.4'
  'Pd'  'Pd'  -0.9988   1.0072
  'International Tables Vol C Tables 4.2.6.8 and 6.1.1.4'
  'Te'  'Te'  -0.5308   1.6751
  'International Tables Vol C Tables 4.2.6.8 and 6.1.1.4'
 
_symmetry_cell_setting            monoclinic
_symmetry_space_group_name_H-M    P21/c
 
loop_
  _symmetry_equiv_pos_as_xyz
  'x, y, z'
  '-x, y+1/2, -z+1/2'
  '-x, -y, -z'
  'x, -y-1/2, z-1/2'
 
_cell_length_a                    11.627(2)
_cell_length_b                    13.388(3)
_cell_length_c                    11.859(2)
_cell_angle_alpha                 90.00
_cell_angle_beta                  106.88(3)
_cell_angle_gamma                 90.00
_cell_volume                      1766.5(6)
_cell_formula_units_Z             4
_cell_measurement_temperature     173(2)
_cell_measurement_reflns_used     ?
_cell_measurement_theta_min       ?
_cell_measurement_theta_max       ?
 
_exptl_crystal_description        ?
_exptl_crystal_colour             ?
_exptl_crystal_size_max           0.3
_exptl_crystal_size_mid           0.3
_exptl_crystal_size_min           0.2
_exptl_crystal_density_meas       ?
_exptl_crystal_density_diffrn     2.037
_exptl_crystal_density_method     'not measured'
_exptl_crystal_F_000              1048
_exptl_absorpt_coefficient_mu     2.907
_exptl_absorpt_correction_type    PSI-Scan
_exptl_absorpt_correction_T_min   ?
_exptl_absorpt_correction_T_max   ?
_exptl_absorpt_process_details    ?
 
_exptl_special_details
 
_diffrn_ambient_temperature       173(2)
_diffrn_radiation_wavelength      0.71073
_diffrn_radiation_type            MoK\a
_diffrn_radiation_source          'fine-focus sealed tube'
_diffrn_radiation_monochromator   graphite
_diffrn_measurement_device_type   ?
_diffrn_measurement_method        ?
_diffrn_detector_area_resol_mean  ?
_diffrn_standards_number          ?
_diffrn_standards_interval_count  ?
_diffrn_standards_interval_time   ?
_diffrn_standards_decay_%         ?
_diffrn_reflns_number             4974
_diffrn_reflns_av_R_equivalents   0.0341
_diffrn_reflns_av_sigmaI/netI     0.0367
_diffrn_reflns_limit_h_min        -6
_diffrn_reflns_limit_h_max        15
_diffrn_reflns_limit_k_min        -18
_diffrn_reflns_limit_k_max        18
_diffrn_reflns_limit_l_min        -17
_diffrn_reflns_limit_l_max        17
_diffrn_reflns_theta_min          2.35
_diffrn_reflns_theta_max          32.37
_reflns_number_total              4476
_reflns_number_gt                 3687
_reflns_threshold_expression      >2sigma(I)
 
_computing_data_collection        Siemens XSCANS'
_computing_cell_refinement        'Siemens XSCANS'
_computing_data_reduction         'Siemens SHELXTL'
_computing_structure_solution     'SHELXS-97 (Sheldrick, 1990)'
_computing_structure_refinement   'SHELXL-97 (Sheldrick, 1997)'
_computing_molecular_graphics     'Siemens SHELXTL'
_computing_publication_material   'Siemens SHELXTL'
 
_refine_special_details
;
  Refinement of F^2^ against ALL reflections.  The weighted R-factor wR and
  goodness of fit S are based on F^2^, conventional R-factors R are based
  on F, with F set to zero for negative F^2^. The threshold expression of
  F^2^ > 2sigma(F^2^) is used only for calculating R-factors(gt) etc. and is
  not relevant to the choice of reflections for refinement.  R-factors based
  on F^2^ are statistically about twice as large as those based on F, and R-
  factors based on ALL data will be even larger.
;
 
_refine_ls_structure_factor_coef  Fsqd
_refine_ls_matrix_type            full
_refine_ls_weighting_scheme       calc
_refine_ls_weighting_details
  'calc w=1/[\s^2^(Fo^2^)+(0.0543P)^2^+0.0000P] where P=(Fo^2^+2Fc^2^)/3'
_atom_sites_solution_primary      direct
_atom_sites_solution_secondary    difmap
_atom_sites_solution_hydrogens    geom
_refine_ls_hydrogen_treatment     mixed
_refine_ls_extinction_method      SHELXL
_refine_ls_extinction_coef        0.0007(2)
_refine_ls_extinction_expression
  'Fc^*^=kFc[1+0.001xFc^2^\l^3^/sin(2\q)]^-1/4^'
_refine_ls_number_reflns          4476
_refine_ls_number_parameters      200
_refine_ls_number_restraints      0
_refine_ls_R_factor_all           0.0561
_refine_ls_R_factor_gt            0.0425
_refine_ls_wR_factor_ref          0.1147
_refine_ls_wR_factor_gt           0.1076
_refine_ls_goodness_of_fit_ref    1.297
_refine_ls_restrained_S_all       1.297
_refine_ls_shift/su_max           0.000
_refine_ls_shift/su_mean          0.000
 
loop_
  _atom_site_label
  _atom_site_type_symbol
  _atom_site_fract_x
  _atom_site_fract_y
  _atom_site_fract_z
  _atom_site_U_iso_or_equiv
  _atom_site_adp_type
  _atom_site_occupancy
  _atom_site_symmetry_multiplicity
  _atom_site_calc_flag
  _atom_site_refinement_flags
  _atom_site_disorder_assembly
  _atom_site_disorder_group
Pd Pd 0.25310(4) 0.08056(3) 0.65050(3) 0.01862(10) Uani 1 1 d . . .
Te Te 0.13182(4) 0.22596(3) 0.68743(3) 0.02774(11) Uani 1 1 d . . .
P P 0.14230(12) -0.02873(9) 0.71212(9) 0.0189(2) Uani 1 1 d . . .
Cl Cl 0.38179(15) -0.05630(10) 0.63949(12) 0.0357(3) Uani 1 1 d . . .
N N 0.3575(4) 0.1881(3) 0.5890(3) 0.0238(8) Uani 1 1 d . . .
C1 C 0.2490(7) 0.3327(4) 0.6412(5) 0.0382(14) Uani 1 1 d . . .
H1A H 0.2046 0.3924 0.6082 0.046 Uiso 1 1 calc R . .
H1B H 0.3136 0.3514 0.7103 0.046 Uiso 1 1 calc R . .
C2 C 0.2968(7) 0.2854(4) 0.5554(5) 0.0377(15) Uani 1 1 d . . .
H2A H 0.3536 0.3310 0.5370 0.045 Uiso 1 1 calc R . .
H2B H 0.2314 0.2759 0.4838 0.045 Uiso 1 1 calc R . .
C3 C 0.3886(7) 0.1481(5) 0.4918(5) 0.0390(14) Uani 1 1 d . . .
H3A H 0.4354 0.1961 0.4640 0.058 Uiso 1 1 calc R . .
H3B H 0.3169 0.1328 0.4300 0.058 Uiso 1 1 calc R . .
H3C H 0.4348 0.0883 0.5155 0.058 Uiso 1 1 calc R . .
C4 C 0.4714(6) 0.2023(6) 0.6767(5) 0.0439(16) Uani 1 1 d . . .
H4A H 0.5180 0.2505 0.6489 0.066 Uiso 1 1 calc R . .
H4B H 0.5140 0.1400 0.6912 0.066 Uiso 1 1 calc R . .
H4C H 0.4583 0.2259 0.7484 0.066 Uiso 1 1 calc R . .
C5 C 0.0889(6) -0.1300(4) 0.6169(4) 0.0299(11) Uani 1 1 d . . .
H5A H 0.0420 -0.1732 0.6508 0.045 Uiso 1 1 calc R . .
H5B H 0.1558 -0.1665 0.6055 0.045 Uiso 1 1 calc R . .
H5C H 0.0398 -0.1055 0.5423 0.045 Uiso 1 1 calc R . .
C6 C 0.2289(5) -0.0864(4) 0.8381(4) 0.0217(9) Uani 1 1 d . . .
C7 C 0.3139(5) -0.0316(4) 0.9143(4) 0.0291(11) Uani 1 1 d . . .
H7A H 0.3273 0.0346 0.8976 0.035 Uiso 1 1 calc R . .
C8 C 0.3774(6) -0.0737(5) 1.0127(5) 0.0369(13) Uani 1 1 d . . .
H8A H 0.4347 -0.0368 1.0680 0.044 Uiso 1 1 calc R . .
C9 C 0.3588(6) -0.1730(5) 1.0337(4) 0.0361(14) Uani 1 1 d . . .
H9A H 0.4065 -0.2024 1.1025 0.043 Uiso 1 1 calc R . .
C10 C 0.2739(6) -0.2290(4) 0.9581(4) 0.0326(13) Uani 1 1 d . . .
H10A H 0.2620 -0.2956 0.9743 0.039 Uiso 1 1 calc R . .
C11 C 0.2084(5) -0.1858(4) 0.8603(4) 0.0255(10) Uani 1 1 d . . .
H11A H 0.1486 -0.2217 0.8065 0.031 Uiso 1 1 calc R . .
C12 C 0.0076(5) 0.0138(4) 0.7433(4) 0.0219(9) Uani 1 1 d . . .
C13 C 0.0127(5) 0.0531(4) 0.8450(4) 0.0266(10) Uani 1 1 d . . .
H13A H 0.0861 0.0573 0.9032 0.032 Uiso 1 1 calc R . .
C14 C -0.0904(6) 0.0889(4) 0.8670(5) 0.0321(12) Uani 1 1 d . . .
H14A H -0.0836 0.1162 0.9408 0.039 Uiso 1 1 calc R . .
C15 C -0.2000(6) 0.0863(4) 0.7879(5) 0.0336(13) Uani 1 1 d . . .
H15A H -0.2675 0.1115 0.8051 0.040 Uiso 1 1 calc R . .
C16 C -0.2067(5) 0.0468(5) 0.6864(5) 0.0322(12) Uani 1 1 d . . .
H16A H -0.2805 0.0424 0.6289 0.039 Uiso 1 1 calc R . .
C17 C -0.1049(5) 0.0116(4) 0.6642(4) 0.0263(10) Uani 1 1 d . . .
H17A H -0.1126 -0.0156 0.5902 0.032 Uiso 1 1 calc R . .
 
loop_
  _atom_site_aniso_label
  _atom_site_aniso_U_11
  _atom_site_aniso_U_22
  _atom_site_aniso_U_33
  _atom_site_aniso_U_23
  _atom_site_aniso_U_13
  _atom_site_aniso_U_12
Pd 0.0205(2) 0.02092(17) 0.01644(14) 0.00052(11) 0.00852(12) 0.00161(14)
Te 0.0303(2) 0.02521(18) 0.03081(17) -0.00126(11) 0.01380(14) 0.00573(14)
P 0.0218(7) 0.0201(5) 0.0162(4) -0.0012(4) 0.0075(4) -0.0009(5)
Cl 0.0425(9) 0.0297(6) 0.0438(7) 0.0017(5) 0.0263(6) 0.0107(6)
N 0.025(2) 0.026(2) 0.0207(16) -0.0005(14) 0.0070(15) -0.0051(18)
C1 0.052(4) 0.028(3) 0.039(3) 0.000(2) 0.019(3) -0.005(3)
C2 0.058(5) 0.028(3) 0.029(2) 0.0069(19) 0.016(3) -0.003(3)
C3 0.048(4) 0.044(3) 0.032(2) -0.002(2) 0.024(3) -0.010(3)
C4 0.027(3) 0.068(4) 0.033(3) 0.003(3) 0.003(2) -0.005(3)
C5 0.039(3) 0.032(2) 0.0202(18) -0.0082(17) 0.010(2) -0.006(2)
C6 0.019(2) 0.031(2) 0.0176(17) 0.0003(15) 0.0086(16) 0.003(2)
C7 0.030(3) 0.034(3) 0.023(2) 0.0017(18) 0.007(2) -0.003(2)
C8 0.030(3) 0.052(3) 0.024(2) 0.003(2) 0.000(2) -0.004(3)
C9 0.039(4) 0.051(3) 0.0191(19) 0.008(2) 0.010(2) 0.018(3)
C10 0.048(4) 0.027(2) 0.028(2) 0.0080(18) 0.019(2) 0.007(3)
C11 0.026(3) 0.030(2) 0.0248(19) -0.0012(17) 0.0135(19) -0.004(2)
C12 0.021(3) 0.026(2) 0.0210(18) 0.0004(15) 0.0087(17) -0.004(2)
C13 0.027(3) 0.031(2) 0.0217(18) 0.0008(17) 0.0068(18) 0.003(2)
C14 0.037(4) 0.038(3) 0.028(2) 0.0006(19) 0.020(2) 0.010(3)
C15 0.032(3) 0.038(3) 0.038(3) 0.009(2) 0.023(2) 0.009(3)
C16 0.020(3) 0.038(3) 0.036(2) 0.007(2) 0.004(2) 0.002(2)
C17 0.023(3) 0.030(2) 0.025(2) 0.0025(17) 0.0058(19) -0.001(2)
 
_geom_special_details
;
  All esds (except the esd in the dihedral angle between two l.s. planes)
  are estimated using the full covariance matrix.  The cell esds are taken
  into account individually in the estimation of esds in distances, angles
  and torsion angles; correlations between esds in cell parameters are only
  used when they are defined by crystal symmetry.  An approximate (isotropic)
  treatment of cell esds is used for estimating esds involving l.s. planes.
;
 
loop_
  _geom_bond_atom_site_label_1
  _geom_bond_atom_site_label_2
  _geom_bond_distance
  _geom_bond_site_symmetry_2
  _geom_bond_publ_flag
Pd N 2.143(4) . ?
Pd P 2.2093(13) . ?
Pd Cl 2.3929(14) . ?
Pd Te 2.5156(6) . ?
Te C1 2.153(6) . ?
P C6 1.723(5) . ?
P C5 1.758(5) . ?
P C12 1.803(5) . ?
N C3 1.409(6) . ?
N C4 1.440(7) . ?
N C2 1.481(7) . ?
C1 C2 1.439(8) . ?
C6 C7 1.346(7) . ?
C6 C11 1.390(7) . ?
C7 C8 1.314(7) . ?
C8 C9 1.380(9) . ?
C9 C10 1.352(9) . ?
C10 C11 1.322(7) . ?
C12 C13 1.301(6) . ?
C12 C17 1.372(7) . ?
C13 C14 1.385(8) . ?
C14 C15 1.346(9) . ?
C15 C16 1.296(8) . ?
C16 C17 1.369(8) . ?
 
loop_
  _geom_angle_atom_site_label_1
  _geom_angle_atom_site_label_2
  _geom_angle_atom_site_label_3
  _geom_angle
  _geom_angle_site_symmetry_1
  _geom_angle_site_symmetry_3
  _geom_angle_publ_flag
N Pd P 178.89(13) . . ?
N Pd Cl 94.07(13) . . ?
P Pd Cl 86.84(5) . . ?
N Pd Te 86.61(13) . . ?
P Pd Te 92.56(4) . . ?
Cl Pd Te 173.20(4) . . ?
C1 Te Pd 92.36(17) . . ?
C6 P C5 102.7(3) . . ?
C6 P C12 106.7(2) . . ?
C5 P C12 102.1(3) . . ?
C6 P Pd 109.48(19) . . ?
C5 P Pd 115.42(18) . . ?
C12 P Pd 118.91(16) . . ?
C3 N C4 103.9(5) . . ?
C3 N C2 109.3(4) . . ?
C4 N C2 110.2(5) . . ?
C3 N Pd 109.2(3) . . ?
C4 N Pd 109.6(4) . . ?
C2 N Pd 114.2(4) . . ?
C2 C1 Te 106.9(4) . . ?
C1 C2 N 116.7(4) . . ?
C7 C6 C11 121.8(5) . . ?
C7 C6 P 117.9(4) . . ?
C11 C6 P 120.3(4) . . ?
C8 C7 C6 118.4(5) . . ?
C7 C8 C9 119.8(6) . . ?
C10 C9 C8 122.5(5) . . ?
C11 C10 C9 117.5(5) . . ?
C10 C11 C6 119.9(5) . . ?
C13 C12 C17 114.9(5) . . ?
C13 C12 P 120.6(4) . . ?
C17 C12 P 124.4(4) . . ?
C12 C13 C14 120.4(5) . . ?
C15 C14 C13 123.8(5) . . ?
C16 C15 C14 116.6(6) . . ?
C15 C16 C17 119.8(6) . . ?
C16 C17 C12 124.5(5) . . ?
 
loop_
  _geom_torsion_atom_site_label_1
  _geom_torsion_atom_site_label_2
  _geom_torsion_atom_site_label_3
  _geom_torsion_atom_site_label_4
  _geom_torsion
  _geom_torsion_site_symmetry_1
  _geom_torsion_site_symmetry_2
  _geom_torsion_site_symmetry_3
  _geom_torsion_site_symmetry_4
  _geom_torsion_publ_flag
N Pd Te C1 -5.2(2) . . . . ?
P Pd Te C1 175.55(17) . . . . ?
Cl Pd Te C1 90.8(4) . . . . ?
N Pd P C6 -157(6) . . . . ?
Cl Pd P C6 58.32(17) . . . . ?
Te Pd P C6 -114.90(17) . . . . ?
N Pd P C5 88(6) . . . . ?
Cl Pd P C5 -56.9(2) . . . . ?
Te Pd P C5 129.8(2) . . . . ?
N Pd P C12 -34(6) . . . . ?
Cl Pd P C12 -178.79(18) . . . . ?
Te Pd P C12 7.99(17) . . . . ?
P Pd N C3 -100(6) . . . . ?
Cl Pd N C3 44.5(4) . . . . ?
Te Pd N C3 -142.3(4) . . . . ?
P Pd N C4 146(6) . . . . ?
Cl Pd N C4 -68.6(4) . . . . ?
Te Pd N C4 104.6(4) . . . . ?
P Pd N C2 22(6) . . . . ?
Cl Pd N C2 167.2(3) . . . . ?
Te Pd N C2 -19.6(3) . . . . ?
Pd Te C1 C2 30.2(5) . . . . ?
Te C1 C2 N -54.5(7) . . . . ?
C3 N C2 C1 174.6(6) . . . . ?
C4 N C2 C1 -71.9(7) . . . . ?
Pd N C2 C1 52.0(7) . . . . ?
C5 P C6 C7 158.4(4) . . . . ?
C12 P C6 C7 -94.6(5) . . . . ?
Pd P C6 C7 35.3(5) . . . . ?
C5 P C6 C11 -23.1(5) . . . . ?
C12 P C6 C11 83.9(4) . . . . ?
Pd P C6 C11 -146.2(4) . . . . ?
C11 C6 C7 C8 -1.0(9) . . . . ?
P C6 C7 C8 177.5(5) . . . . ?
C6 C7 C8 C9 2.3(10) . . . . ?
C7 C8 C9 C10 -2.3(10) . . . . ?
C8 C9 C10 C11 0.8(9) . . . . ?
C9 C10 C11 C6 0.5(8) . . . . ?
C7 C6 C11 C10 -0.5(8) . . . . ?
P C6 C11 C10 -178.9(4) . . . . ?
C6 P C12 C13 40.5(5) . . . . ?
C5 P C12 C13 147.9(4) . . . . ?
Pd P C12 C13 -83.8(4) . . . . ?
C6 P C12 C17 -142.1(4) . . . . ?
C5 P C12 C17 -34.6(5) . . . . ?
Pd P C12 C17 93.7(5) . . . . ?
C17 C12 C13 C14 0.1(8) . . . . ?
P C12 C13 C14 177.7(4) . . . . ?
C12 C13 C14 C15 -0.3(9) . . . . ?
C13 C14 C15 C16 0.7(9) . . . . ?
C14 C15 C16 C17 -0.8(9) . . . . ?
C15 C16 C17 C12 0.7(9) . . . . ?
C13 C12 C17 C16 -0.3(8) . . . . ?
P C12 C17 C16 -177.8(4) . . . . ?
 
_diffrn_measured_fraction_theta_max    0.708
_diffrn_reflns_theta_full              32.37
_diffrn_measured_fraction_theta_full   0.708
_refine_diff_density_max    0.907
_refine_diff_density_min   -0.927
_refine_diff_density_rms    0.164


#===================================================================== 

data_ptte
 
_audit_creation_method            SHELXL-97
_chemical_name_systematic
_chemical_name_common             Diphenylmethylphosphine chloro 
2(N,N-dimethylamino)ethyltellurato platinum(II)
_chemical_melting_point           ?
_chemical_formula_moiety          ?
_chemical_formula_sum             'C17 H23 Cl N P Pt Te'
_chemical_formula_weight          630.47
 
loop_
  _atom_type_symbol
  _atom_type_description
  _atom_type_scat_dispersion_real
  _atom_type_scat_dispersion_imag
  _atom_type_scat_source
  'C'  'C'   0.0033   0.0016
  'International Tables Vol C Tables 4.2.6.8 and 6.1.1.4'
  'H'  'H'   0.0000   0.0000
  'International Tables Vol C Tables 4.2.6.8 and 6.1.1.4'
  'N'  'N'   0.0061   0.0033
  'International Tables Vol C Tables 4.2.6.8 and 6.1.1.4'
  'P'  'P'   0.1023   0.0942
  'International Tables Vol C Tables 4.2.6.8 and 6.1.1.4'
  'Cl'  'Cl'   0.1484   0.1585
  'International Tables Vol C Tables 4.2.6.8 and 6.1.1.4'
  'Pt'  'Pt'  -1.7033   8.3905
  'International Tables Vol C Tables 4.2.6.8 and 6.1.1.4'
  'Te'  'Te'  -0.5308   1.6751
  'International Tables Vol C Tables 4.2.6.8 and 6.1.1.4'
 
_symmetry_cell_setting           monoclinic
_symmetry_space_group_name_H-M   P21/c
 
loop_
  _symmetry_equiv_pos_as_xyz
  'x, y, z'
  '-x, y+1/2, -z+1/2'
  '-x, -y, -z'
  'x, -y-1/2, z-1/2'
 
_cell_length_a                    11.682(2)
_cell_length_b                    13.499(3)
_cell_length_c                    12.926(3)
_cell_angle_alpha                 90.00
_cell_angle_beta                  106.70(3)
_cell_angle_gamma                 90.00
_cell_volume                      1952.6(7)
_cell_formula_units_Z             4
_cell_measurement_temperature     293(2)
_cell_measurement_reflns_used     ?
_cell_measurement_theta_min       ?
_cell_measurement_theta_max       ?
 
_exptl_crystal_description        ?
_exptl_crystal_colour             ?
_exptl_crystal_size_max           0.1
_exptl_crystal_size_mid           0.1
_exptl_crystal_size_min           0.05
_exptl_crystal_density_meas       ?
_exptl_crystal_density_diffrn     2.145
_exptl_crystal_density_method     'not measured'
_exptl_crystal_F_000              1176
_exptl_absorpt_coefficient_mu     8.866
_exptl_absorpt_correction_type    numerical (HABITUS)
_exptl_absorpt_correction_T_min   ?
_exptl_absorpt_correction_T_max   ?
_exptl_absorpt_process_details    ?
 
_exptl_special_details
;
 
_diffrn_ambient_temperature       293(2)
_diffrn_radiation_wavelength      0.71073
_diffrn_radiation_type            MoK\a
_diffrn_radiation_source          'fine-focus sealed tube'
_diffrn_radiation_monochromator   'horizontally mounted graphite'
_diffrn_measurement_device_type   'Nonius Kappa CCD'
_diffrn_measurement_device_type   '95mm CCD camera on \k-goniostat'
_diffrn_measurement_method        'CCD'
_diffrn_detector_area_resol_mean  9
_diffrn_standards_number          ?
_diffrn_standards_interval_count  ?
_diffrn_standards_interval_time   ?
_diffrn_standards_decay_%         ?
_diffrn_reflns_number             13907
_diffrn_reflns_av_R_equivalents   0.0496
_diffrn_reflns_av_sigmaI/netI     0.0282
_diffrn_reflns_limit_h_min        -11
_diffrn_reflns_limit_h_max        11
_diffrn_reflns_limit_k_min        -13
_diffrn_reflns_limit_k_max        13
_diffrn_reflns_limit_l_min        -12
_diffrn_reflns_limit_l_max        12
_diffrn_reflns_theta_min          6.85
_diffrn_reflns_theta_max          20.82
_reflns_number_total              1968
_reflns_number_gt                 1866
_reflns_threshold_expression      >2sigma(I)
 
_computing_data_collection        'Collect (Nonius1997-2000)'
_computing_cell_refinement        'HKL Scalepack'
_computing_data_reduction         'HKL Denzo and Scalepack'
_computing_structure_solution     'SHELXS-97 (Sheldrick, 1990)'
_computing_structure_refinement   'SHELXL-97 (Sheldrick, 1997)'
_computing_molecular_graphics     'Bruker SHELXTL'
_computing_publication_material   'Bruker SHELXTL'
 
_refine_special_details
;
  Refinement of F^2^ against ALL reflections.  The weighted R-factor wR and
  goodness of fit S are based on F^2^, conventional R-factors R are based
  on F, with F set to zero for negative F^2^. The threshold expression of
  F^2^ > 2sigma(F^2^) is used only for calculating R-factors(gt) etc. and is
  not relevant to the choice of reflections for refinement.  R-factors based
  on F^2^ are statistically about twice as large as those based on F, and R-
  factors based on ALL data will be even larger.
;
 
_refine_ls_structure_factor_coef  Fsqd
_refine_ls_matrix_type            full
_refine_ls_weighting_scheme       calc
_refine_ls_weighting_details
  'calc w=1/[\s^2^(Fo^2^)+(0.0431P)^2^+8.1481P] where P=(Fo^2^+2Fc^2^)/3'
_atom_sites_solution_primary      direct
_atom_sites_solution_secondary    difmap
_atom_sites_solution_hydrogens    geom
_refine_ls_hydrogen_treatment     mixed
_refine_ls_extinction_method      SHELXL
_refine_ls_extinction_coef        0.00161(11)
_refine_ls_extinction_expression
  'Fc^*^=kFc[1+0.001xFc^2^\l^3^/sin(2\q)]^-1/4^'
_refine_ls_number_reflns          1968
_refine_ls_number_parameters      200
_refine_ls_number_restraints      0
_refine_ls_R_factor_all           0.0319
_refine_ls_R_factor_gt            0.0301
_refine_ls_wR_factor_ref          0.0788
_refine_ls_wR_factor_gt           0.0768
_refine_ls_goodness_of_fit_ref    1.050
_refine_ls_restrained_S_all       1.050
_refine_ls_shift/su_max           0.024
_refine_ls_shift/su_mean          0.001
 
loop_
  _atom_site_label
  _atom_site_type_symbol
  _atom_site_fract_x
  _atom_site_fract_y
  _atom_site_fract_z
  _atom_site_U_iso_or_equiv
  _atom_site_adp_type
  _atom_site_occupancy
  _atom_site_symmetry_multiplicity
  _atom_site_calc_flag
  _atom_site_refinement_flags
  _atom_site_disorder_assembly
  _atom_site_disorder_group

Pt Pt 0.753612(14) 0.080241(12) 0.654371(13) 0.04663(6) Uani 1 1 d . . .
Te Te 0.63015(3) 0.22505(2) 0.68475(3) 0.06590(10) Uani 1 1 d . . .
P P 0.64692(9) -0.03030(8) 0.71389(8) 0.0454(3) Uani 1 1 d . . .
Cl Cl 0.88251(11) -0.05183(11) 0.63914(12) 0.0816(4) Uani 1 1 d . . .
N N 0.8586(3) 0.1867(3) 0.5928(3) 0.0587(11) Uani 1 1 d . . .
C1 C 0.7427(5) 0.3292(4) 0.6344(5) 0.093(2) Uani 1 1 d . . .
H1A H 0.6962 0.3862 0.6007 0.112 Uiso 1 1 calc R . .
H1B H 0.8058 0.3519 0.6964 0.112 Uiso 1 1 calc R . .
C2 C 0.7947(6) 0.2797(5) 0.5568(6) 0.102(2) Uani 1 1 d . . .
H2A H 0.7308 0.2664 0.4914 0.123 Uiso 1 1 calc R . .
H2B H 0.8496 0.3255 0.5380 0.123 Uiso 1 1 calc R . .
C3 C 0.9734(5) 0.1990(6) 0.6725(6) 0.114(2) Uani 1 1 d . . .
H3A H 1.0202 0.2463 0.6467 0.172 Uiso 1 1 calc R . .
H3B H 1.0144 0.1366 0.6849 0.172 Uiso 1 1 calc R . .
H3C H 0.9617 0.2225 0.7388 0.172 Uiso 1 1 calc R . .
C4 C 0.8823(6) 0.1487(5) 0.4913(5) 0.101(2) Uani 1 1 d . . .
H4A H 0.9280 0.1968 0.4654 0.151 Uiso 1 1 calc R . .
H4B H 0.8077 0.1374 0.4372 0.151 Uiso 1 1 calc R . .
H4C H 0.9262 0.0877 0.5066 0.151 Uiso 1 1 calc R . .
C5 C 0.5948(4) -0.1305(4) 0.6186(3) 0.0614(14) Uani 1 1 d . . .
H5A H 0.5490 -0.1763 0.6474 0.092 Uiso 1 1 calc R . .
H5B H 0.6622 -0.1641 0.6064 0.092 Uiso 1 1 calc R . .
H5C H 0.5456 -0.1041 0.5516 0.092 Uiso 1 1 calc R . .
C6 C 0.7315(3) -0.0885(3) 0.8400(3) 0.0428(13) Uani 1 1 d . . .
C7 C 0.7109(4) -0.1858(3) 0.8641(4) 0.0607(14) Uani 1 1 d . . .
H7A H 0.6530 -0.2228 0.8148 0.073 Uiso 1 1 calc R . .
C8 C 0.7743(5) -0.2277(4) 0.9591(4) 0.0724(16) Uani 1 1 d . . .
H8A H 0.7610 -0.2935 0.9735 0.087 Uiso 1 1 calc R . .
C9 C 0.8557(4) -0.1745(4) 1.0318(4) 0.0738(17) Uani 1 1 d . . .
H9A H 0.8980 -0.2046 1.0962 0.089 Uiso 1 1 calc R . .
C10 C 0.8790(5) -0.0768(4) 1.0147(5) 0.080(2) Uani 1 1 d . . .
H10A H 0.9343 -0.0401 1.0667 0.096 Uiso 1 1 calc R . .
C11 C 0.8155(4) -0.0349(4) 0.9149(4) 0.0673(16) Uani 1 1 d . . .
H11A H 0.8308 0.0303 0.8995 0.081 Uiso 1 1 calc R . .
C12 C 0.5120(3) 0.0119(3) 0.7446(3) 0.0491(12) Uani 1 1 d . . .
C13 C 0.5167(4) 0.0497(4) 0.8465(4) 0.0624(15) Uani 1 1 d . . .
H13A H 0.5888 0.0499 0.9010 0.075 Uiso 1 1 calc R . .
C14 C 0.4132(5) 0.0874(4) 0.8672(4) 0.0724(17) Uani 1 1 d . . .
H14A H 0.4175 0.1138 0.9346 0.087 Uiso 1 1 calc R . .
C15 C 0.3064(5) 0.0852(4) 0.7882(5) 0.0727(17) Uani 1 1 d . . .
H15A H 0.2381 0.1100 0.8023 0.087 Uiso 1 1 calc R . .
C16 C 0.2994(4) 0.0468(4) 0.6885(5) 0.0766(18) Uani 1 1 d . . .
H16A H 0.2259 0.0443 0.6359 0.092 Uiso 1 1 calc R . .
C17 C 0.4016(4) 0.0114(4) 0.6648(4) 0.0628(15) Uani 1 1 d . . .
H17A H 0.3962 -0.0125 0.5961 0.075 Uiso 1 1 calc R . .
 
loop_
  _atom_site_aniso_label
  _atom_site_aniso_U_11
  _atom_site_aniso_U_22
  _atom_site_aniso_U_33
  _atom_site_aniso_U_23
  _atom_site_aniso_U_13
  _atom_site_aniso_U_12

Pt 0.05031(10) 0.04508(11) 0.04802(10) 0.00092(7) 0.01977(8) 0.00052(7)
Te 0.06910(17) 0.05093(18) 0.0834(2) -0.00026(15) 0.03113(15) 0.01001(14)
P 0.0489(5) 0.0442(6) 0.0462(5) -0.0013(5) 0.0188(4) 0.0011(5)
Cl 0.0841(6) 0.0686(7) 0.1128(8) 0.0045(7) 0.0613(6) 0.0193(6)
N 0.066(2) 0.061(2) 0.0535(19) 0.0102(18) 0.0228(16) -0.0005(19)
C1 0.109(4) 0.057(3) 0.125(4) 0.006(3) 0.053(3) -0.003(3)
C2 0.117(4) 0.077(4) 0.137(4) 0.007(3) 0.075(3) -0.011(3)
C3 0.064(3) 0.150(5) 0.108(4) 0.041(4) -0.010(3) -0.049(3)
C4 0.126(4) 0.113(5) 0.081(3) 0.005(3) 0.059(3) -0.033(4)
C5 0.072(3) 0.068(3) 0.048(2) -0.013(2) 0.023(2) -0.008(2)
C6 0.043(2) 0.045(3) 0.044(2) -0.0001(17) 0.0187(18) -0.0040(17)
C7 0.069(3) 0.049(3) 0.070(3) 0.000(2) 0.029(2) -0.001(2)
C8 0.093(3) 0.071(3) 0.064(3) 0.016(2) 0.039(2) 0.016(3)
C9 0.069(3) 0.100(4) 0.058(3) 0.023(3) 0.027(2) 0.030(3)
C10 0.067(3) 0.102(4) 0.067(3) 0.000(3) 0.012(3) -0.016(3)
C11 0.066(3) 0.072(3) 0.064(3) 0.008(3) 0.020(2) -0.012(3)
C12 0.047(2) 0.050(2) 0.054(2) 0.007(2) 0.0195(18) -0.0040(19)
C13 0.072(3) 0.059(3) 0.058(3) -0.001(2) 0.021(2) 0.005(2)
C14 0.099(3) 0.065(3) 0.070(3) -0.007(2) 0.051(2) 0.013(2)
C15 0.071(3) 0.069(3) 0.087(3) 0.017(2) 0.037(3) 0.025(2)
C16 0.040(2) 0.073(3) 0.113(4) 0.014(3) 0.015(3) 0.003(2)
C17 0.063(3) 0.067(3) 0.059(3) 0.002(2) 0.019(2) -0.005(2)
 
_geom_special_details
;
  All esds (except the esd in the dihedral angle between two l.s. planes)
  are estimated using the full covariance matrix.  The cell esds are taken
  into account individually in the estimation of esds in distances, angles
  and torsion angles; correlations between esds in cell parameters are only
  used when they are defined by crystal symmetry.  An approximate (isotropic)
  treatment of cell esds is used for estimating esds involving l.s. planes.
;
 
loop_
  _geom_bond_atom_site_label_1
  _geom_bond_atom_site_label_2
  _geom_bond_distance
  _geom_bond_site_symmetry_2
  _geom_bond_publ_flag

Pt N 2.182(4) . ?
Pt P 2.2189(12) . ?
Pt Cl 2.3780(14) . ?
Pt Te 2.5261(5) . ?
Te C1 2.150(6) . ?
P C5 1.813(5) . ?
P C12 1.823(5) . ?
P C6 1.824(4) . ?
N C3 1.447(6) . ?
N C2 1.467(7) . ?
N C4 1.506(7) . ?
C1 C2 1.474(10) . ?
C6 C11 1.370(6) . ?
C6 C7 1.387(6) . ?
C7 C8 1.362(6) . ?
C8 C9 1.337(7) . ?
C9 C10 1.378(8) . ?
C10 C11 1.409(7) . ?
C12 C13 1.399(7) . ?
C12 C17 1.401(6) . ?
C13 C14 1.406(8) . ?
C14 C15 1.367(7) . ?
C15 C16 1.370(9) . ?
C16 C17 1.399(8) . ?
 
loop_
  _geom_angle_atom_site_label_1
  _geom_angle_atom_site_label_2
  _geom_angle_atom_site_label_3
  _geom_angle
  _geom_angle_site_symmetry_1
  _geom_angle_site_symmetry_3
  _geom_angle_publ_flag
N Pt P 178.69(11) . . ?
N Pt Cl 91.58(11) . . ?
P Pt Cl 87.52(5) . . ?
N Pt Te 87.32(11) . . ?
P Pt Te 93.66(4) . . ?
Cl Pt Te 175.16(3) . . ?
C1 Te Pt 91.88(17) . . ?
C5 P C12 103.8(2) . . ?
C5 P C6 106.0(2) . . ?
C12 P C6 102.7(2) . . ?
C5 P Pt 112.26(17) . . ?
C12 P Pt 118.17(15) . . ?
C6 P Pt 112.68(14) . . ?
C3 N C2 114.2(5) . . ?
C3 N C4 107.2(5) . . ?
C2 N C4 102.6(4) . . ?
C3 N Pt 108.6(3) . . ?
C2 N Pt 113.0(3) . . ?
C4 N Pt 110.9(3) . . ?
C2 C1 Te 108.5(4) . . ?
N C2 C1 116.3(5) . . ?
C11 C6 C7 118.5(4) . . ?
C11 C6 P 119.9(3) . . ?
C7 C6 P 121.6(3) . . ?
C8 C7 C6 120.7(4) . . ?
C9 C8 C7 120.3(5) . . ?
C8 C9 C10 122.3(5) . . ?
C9 C10 C11 117.0(5) . . ?
C6 C11 C10 121.1(5) . . ?
C13 C12 C17 118.2(4) . . ?
C13 C12 P 121.1(3) . . ?
C17 C12 P 120.6(4) . . ?
C12 C13 C14 120.6(4) . . ?
C15 C14 C13 120.0(5) . . ?
C14 C15 C16 120.4(5) . . ?
C15 C16 C17 120.8(5) . . ?
C16 C17 C12 120.0(5) . . ?
 
loop_
  _geom_torsion_atom_site_label_1
  _geom_torsion_atom_site_label_2
  _geom_torsion_atom_site_label_3
  _geom_torsion_atom_site_label_4
  _geom_torsion
  _geom_torsion_site_symmetry_1
  _geom_torsion_site_symmetry_2
  _geom_torsion_site_symmetry_3
  _geom_torsion_site_symmetry_4
  _geom_torsion_publ_flag

N Pt Te C1 -3.77(18) . . . . ?
P Pt Te C1 177.11(17) . . . . ?
Cl Pt Te C1 73.2(5) . . . . ?
N Pt P C5 -11(4) . . . . ?
Cl Pt P C5 -57.11(17) . . . . ?
Te Pt P C5 127.60(17) . . . . ?
N Pt P C12 -131(4) . . . . ?
Cl Pt P C12 -177.84(15) . . . . ?
Te Pt P C12 6.86(15) . . . . ?
N Pt P C6 109(4) . . . . ?
Cl Pt P C6 62.52(15) . . . . ?
Te Pt P C6 -112.78(15) . . . . ?
P Pt N C3 -115(4) . . . . ?
Cl Pt N C3 -68.8(4) . . . . ?
Te Pt N C3 106.5(4) . . . . ?
P Pt N C2 117(4) . . . . ?
Cl Pt N C2 163.3(3) . . . . ?
Te Pt N C2 -21.4(3) . . . . ?
P Pt N C4 2(4) . . . . ?
Cl Pt N C4 48.7(3) . . . . ?
Te Pt N C4 -136.0(3) . . . . ?
Pt Te C1 C2 28.6(4) . . . . ?
C3 N C2 C1 -72.9(7) . . . . ?
C4 N C2 C1 171.5(5) . . . . ?
Pt N C2 C1 52.0(6) . . . . ?
Te C1 C2 N -54.2(6) . . . . ?
C5 P C6 C11 157.3(4) . . . . ?
C12 P C6 C11 -94.1(4) . . . . ?
Pt P C6 C11 34.1(4) . . . . ?
C5 P C6 C7 -24.5(4) . . . . ?
C12 P C6 C7 84.1(4) . . . . ?
Pt P C6 C7 -147.6(4) . . . . ?
C11 C6 C7 C8 -1.2(7) . . . . ?
P C6 C7 C8 -179.5(4) . . . . ?
C6 C7 C8 C9 1.6(8) . . . . ?
C7 C8 C9 C10 0.0(9) . . . . ?
C8 C9 C10 C11 -1.8(9) . . . . ?
C7 C6 C11 C10 -0.6(8) . . . . ?
P C6 C11 C10 177.6(4) . . . . ?
C9 C10 C11 C6 2.1(9) . . . . ?
C5 P C12 C13 147.8(4) . . . . ?
C6 P C12 C13 37.5(4) . . . . ?
Pt P C12 C13 -87.2(4) . . . . ?
C5 P C12 C17 -35.2(4) . . . . ?
C6 P C12 C17 -145.5(4) . . . . ?
Pt P C12 C17 89.8(4) . . . . ?
C17 C12 C13 C14 -0.9(7) . . . . ?
P C12 C13 C14 176.2(4) . . . . ?
C12 C13 C14 C15 1.5(8) . . . . ?
C13 C14 C15 C16 -0.3(8) . . . . ?
C14 C15 C16 C17 -1.5(8) . . . . ?
C15 C16 C17 C12 2.1(8) . . . . ?
C13 C12 C17 C16 -0.9(7) . . . . ?
P C12 C17 C16 -178.0(4) . . . . ?
 
_diffrn_measured_fraction_theta_max    0.964
_diffrn_reflns_theta_full              20.82
_diffrn_measured_fraction_theta_full   0.964
_refine_diff_density_max    0.790
_refine_diff_density_min   -1.149
_refine_diff_density_rms    0.105
 
#===================================================================== 

data_xabs34
 
_audit_creation_method            SHELXL-97
_chemical_name_systematic
_chemical_name_common 
'Dimethylaminoethylselenolato-chloro-(triethylphophine)platinum(II)'
_chemical_melting_point           ?
_chemical_formula_moiety          ?
_chemical_formula_sum 		  'C10 H25 Cl N P Pt Se'
_chemical_formula_weight          499.78
 
loop_
  _atom_type_symbol
  _atom_type_description
  _atom_type_scat_dispersion_real
  _atom_type_scat_dispersion_imag
  _atom_type_scat_source
  'C'  'C'   0.0033   0.0016
  'International Tables Vol C Tables 4.2.6.8 and 6.1.1.4'
  'H'  'H'   0.0000   0.0000
  'International Tables Vol C Tables 4.2.6.8 and 6.1.1.4'
  'N'  'N'   0.0061   0.0033
  'International Tables Vol C Tables 4.2.6.8 and 6.1.1.4'
  'P'  'P'   0.1023   0.0942
  'International Tables Vol C Tables 4.2.6.8 and 6.1.1.4'
  'Cl'  'Cl'   0.1484   0.1585
  'International Tables Vol C Tables 4.2.6.8 and 6.1.1.4'
  'Se'  'Se'  -0.0929   2.2259
  'International Tables Vol C Tables 4.2.6.8 and 6.1.1.4'
  'Pt'  'Pt'  -1.7033   8.3905
  'International Tables Vol C Tables 4.2.6.8 and 6.1.1.4'
 
_symmetry_cell_setting            'orthorhombic'
_symmetry_space_group_name_H-M    'P2(1)2(1)2(1)'
 
loop_
  _symmetry_equiv_pos_as_xyz
  'x, y, z'
  '-x+1/2, -y, z+1/2'
  '-x, y+1/2, -z+1/2'
  'x+1/2, -y+1/2, -z'
 
_cell_length_a                    9.6374(19)
_cell_length_b                    11.5216(16)
_cell_length_c                    13.917(2)
_cell_angle_alpha                 90.00
_cell_angle_beta                  90.00
_cell_angle_gamma                 90.00
_cell_volume                      1545.3(4)
_cell_formula_units_Z             4
_cell_measurement_temperature     173(2)
_cell_measurement_reflns_used     ?
_cell_measurement_theta_min       ?
_cell_measurement_theta_max       ?
 
_exptl_crystal_description        needle
_exptl_crystal_colour             yellow
_exptl_crystal_size_max           0.3
_exptl_crystal_size_mid           0.1
_exptl_crystal_size_min           0.1
_exptl_crystal_density_meas       ?
_exptl_crystal_density_diffrn     2.148
_exptl_crystal_density_method     'not measured'
_exptl_crystal_F_000              944
_exptl_absorpt_coefficient_mu     11.687
_exptl_absorpt_correction_type    psi-scans
_exptl_absorpt_correction_T_min   ?
_exptl_absorpt_correction_T_max   ?
_exptl_absorpt_process_details    lamina 0 0 1
 
_exptl_special_details
 
_diffrn_ambient_temperature       173(2)
_diffrn_radiation_wavelength      0.71073
_diffrn_radiation_type            MoK\a
_diffrn_radiation_source          'fine-focus sealed tube'
_diffrn_radiation_monochromator   graphite
_diffrn_measurement_device_type   'Siemens P4'
_diffrn_measurement_method        '\w scans'
_diffrn_detector_area_resol_mean  ?
_diffrn_standards_number          ?
_diffrn_standards_interval_count  ?
_diffrn_standards_interval_time   ?
_diffrn_standards_decay_%         ?
_diffrn_reflns_number             3801
_diffrn_reflns_av_R_equivalents   0.0000
_diffrn_reflns_av_sigmaI/netI     0.0599
_diffrn_reflns_limit_h_min        -13
_diffrn_reflns_limit_h_max        13
_diffrn_reflns_limit_k_min        0
_diffrn_reflns_limit_k_max        16
_diffrn_reflns_limit_l_min        0
_diffrn_reflns_limit_l_max        19
_diffrn_reflns_theta_min          2.29
_diffrn_reflns_theta_max          30.00
_reflns_number_total              3801
_reflns_number_gt                 3293
_reflns_threshold_expression      >2sigma(I)
 
_computing_data_collection        'Siemens XSCANS'
_computing_cell_refinement        'Siemens XSCANS'
_computing_data_reduction         'Siemens SHELXTL'
_computing_structure_solution     'SHELXS-97 (Sheldrick, 1990)'
_computing_structure_refinement   'SHELXL-97 (Sheldrick, 1997)'
_computing_molecular_graphics     'Siemens SHELXTL'
_computing_publication_material   'Siemens SHELXTL'
 
_refine_special_details
;
  Refinement of F^2^ against ALL reflections.  The weighted R-factor wR and
  goodness of fit S are based on F^2^, conventional R-factors R are based
  on F, with F set to zero for negative F^2^. The threshold expression of
  F^2^ > 2sigma(F^2^) is used only for calculating R-factors(gt) etc. and is
  not relevant to the choice of reflections for refinement.  R-factors based
  on F^2^ are statistically about twice as large as those based on F, and R-
  factors based on ALL data will be even larger.
;
 
_refine_ls_structure_factor_coef  Fsqd
_refine_ls_matrix_type            full
_refine_ls_weighting_scheme       calc
_refine_ls_weighting_details
  'calc w=1/[\s^2^(Fo^2^)+(0.0642P)^2^+0.4003P] where P=(Fo^2^+2Fc^2^)/3'
_atom_sites_solution_primary      direct
_atom_sites_solution_secondary    difmap
_atom_sites_solution_hydrogens    geom
_refine_ls_hydrogen_treatment     mixed
_refine_ls_extinction_method      none
_refine_ls_extinction_coef        ?
_refine_ls_abs_structure_details
  'Flack H D (1983), Acta Cryst. A39, 876-881'
_refine_ls_abs_structure_Flack    0.03(2)
_refine_ls_number_reflns          3801
_refine_ls_number_parameters      136
_refine_ls_number_restraints      0
_refine_ls_R_factor_all           0.0557
_refine_ls_R_factor_gt            0.0424
_refine_ls_wR_factor_ref          0.1064
_refine_ls_wR_factor_gt           0.0986
_refine_ls_goodness_of_fit_ref    0.971
_refine_ls_restrained_S_all       0.971
_refine_ls_shift/su_max           0.001
_refine_ls_shift/su_mean          0.000
 
loop_
  _atom_site_label
  _atom_site_type_symbol
  _atom_site_fract_x
  _atom_site_fract_y
  _atom_site_fract_z
  _atom_site_U_iso_or_equiv
  _atom_site_adp_type
  _atom_site_occupancy
  _atom_site_symmetry_multiplicity
  _atom_site_calc_flag
  _atom_site_refinement_flags
  _atom_site_disorder_assembly
  _atom_site_disorder_group
Pt1 Pt 0.01400(3) 0.92825(2) 0.99319(2) 0.02356(9) Uani 1 1 d . . .
Se1 Se 0.04673(13) 0.77117(7) 1.09922(7) 0.0299(3) Uani 1 1 d . . .
Cl1 Cl -0.0095(5) 1.0835(2) 0.8842(2) 0.0505(9) Uani 1 1 d . . .
P1 P 0.0230(4) 1.05991(17) 1.1085(2) 0.0307(6) Uani 1 1 d . . .
N1 N 0.0211(12) 0.8012(6) 0.8792(6) 0.0325(19) Uani 1 1 d . . .
C1 C -0.0031(15) 0.6824(7) 0.9153(8) 0.039(3) Uani 1 1 d . . .
H1A H 0.0191 0.6275 0.8648 0.047 Uiso 1 1 calc R . .
H1B H -0.1008 0.6737 0.9304 0.047 Uiso 1 1 calc R . .
C2 C 0.0797(12) 0.6532(8) 1.0019(9) 0.041(2) Uani 1 1 d . . .
H2A H 0.1776 0.6507 0.9857 0.049 Uiso 1 1 calc R . .
H2B H 0.0526 0.5776 1.0261 0.049 Uiso 1 1 calc R . .
C11 C 0.1577(13) 0.8097(10) 0.8351(9) 0.045(3) Uani 1 1 d . . .
H11A H 0.1646 0.7547 0.7835 0.067 Uiso 1 1 calc R . .
H11B H 0.2276 0.7933 0.8823 0.067 Uiso 1 1 calc R . .
H11C H 0.1709 0.8867 0.8104 0.067 Uiso 1 1 calc R . .
C12 C -0.0835(13) 0.8242(10) 0.8019(9) 0.042(3) Uani 1 1 d . . .
H12A H -0.0758 0.7659 0.7530 0.063 Uiso 1 1 calc R . .
H12B H -0.0666 0.8993 0.7743 0.063 Uiso 1 1 calc R . .
H12C H -0.1751 0.8223 0.8290 0.063 Uiso 1 1 calc R . .
C21 C 0.0371(12) 1.0119(7) 1.2321(7) 0.032(2) Uani 1 1 d . . .
H21A H 0.1126 0.9565 1.2362 0.039 Uiso 1 1 calc R . .
H21B H 0.0620 1.0782 1.2714 0.039 Uiso 1 1 calc R . .
C22 C -0.0932(15) 0.9558(9) 1.2752(8) 0.048(3) Uani 1 1 d . . .
H22A H -0.0752 0.9338 1.3405 0.072 Uiso 1 1 calc R . .
H22B H -0.1175 0.8882 1.2385 0.072 Uiso 1 1 calc R . .
H22C H -0.1685 1.0104 1.2735 0.072 Uiso 1 1 calc R . .
C31 C -0.1205(13) 1.1622(8) 1.1097(10) 0.042(3) Uani 1 1 d . . .
H31A H -0.1255 1.1974 1.1730 0.050 Uiso 1 1 calc R . .
H31B H -0.1009 1.2235 1.0639 0.050 Uiso 1 1 calc R . .
C32 C -0.2600(15) 1.1104(11) 1.0861(12) 0.052(4) Uani 1 1 d . . .
H32A H -0.3293 1.1703 1.0871 0.079 Uiso 1 1 calc R . .
H32B H -0.2828 1.0522 1.1329 0.079 Uiso 1 1 calc R . .
H32C H -0.2567 1.0759 1.0234 0.079 Uiso 1 1 calc R . .
C41 C 0.1703(12) 1.1538(8) 1.0936(11) 0.040(3) Uani 1 1 d . . .
H41A H 0.1559 1.2016 1.0371 0.048 Uiso 1 1 calc R . .
H41B H 0.1761 1.2051 1.1487 0.048 Uiso 1 1 calc R . .
C42 C 0.3076(13) 1.0893(9) 1.0831(11) 0.047(3) Uani 1 1 d . . .
H42A H 0.3817 1.1443 1.0761 0.071 Uiso 1 1 calc R . .
H42B H 0.3040 1.0402 1.0274 0.071 Uiso 1 1 calc R . .
H42C H 0.3234 1.0426 1.1392 0.071 Uiso 1 1 calc R . .
 
loop_
  _atom_site_aniso_label
  _atom_site_aniso_U_11
  _atom_site_aniso_U_22
  _atom_site_aniso_U_33
  _atom_site_aniso_U_23
  _atom_site_aniso_U_13
  _atom_site_aniso_U_12
Pt1 0.02285(15) 0.02406(13) 0.02376(15) 0.00237(12) 0.00020(15) -0.00112(11)
Se1 0.0391(7) 0.0256(3) 0.0251(5) 0.0016(3) -0.0003(4) 0.0046(4)
Cl1 0.076(3) 0.0374(10) 0.0383(12) 0.0128(10) -0.0063(18) -0.0044(16)
P1 0.0327(14) 0.0222(8) 0.0374(13) -0.0019(8) 0.0012(13) 0.0002(10)
N1 0.034(5) 0.037(3) 0.026(4) -0.010(3) 0.003(4) -0.003(4)
C1 0.057(8) 0.027(4) 0.034(5) -0.011(3) 0.002(6) 0.000(4)
C2 0.048(6) 0.034(4) 0.041(6) -0.006(5) 0.001(7) 0.011(4)
C11 0.034(7) 0.064(7) 0.035(6) -0.009(5) 0.018(6) -0.001(5)
C12 0.029(6) 0.063(7) 0.033(6) -0.001(5) -0.011(5) 0.008(5)
C21 0.037(6) 0.032(4) 0.029(5) -0.002(3) 0.001(4) 0.007(4)
C22 0.073(10) 0.042(5) 0.027(5) -0.007(4) 0.013(6) -0.013(5)
C31 0.044(7) 0.037(5) 0.045(7) -0.005(5) 0.001(6) 0.019(4)
C32 0.058(9) 0.050(7) 0.050(8) -0.001(6) -0.005(7) 0.010(5)
C41 0.035(6) 0.033(5) 0.051(7) 0.000(5) 0.004(6) -0.008(4)
C42 0.038(7) 0.041(5) 0.062(9) -0.006(6) 0.007(6) -0.004(5)
 
_geom_special_details
;
  All esds (except the esd in the dihedral angle between two l.s. planes)
  are estimated using the full covariance matrix.  The cell esds are taken
  into account individually in the estimation of esds in distances, angles
  and torsion angles; correlations between esds in cell parameters are only
  used when they are defined by crystal symmetry.  An approximate (isotropic)
  treatment of cell esds is used for estimating esds involving l.s. planes.
;
 
loop_
  _geom_bond_atom_site_label_1
  _geom_bond_atom_site_label_2
  _geom_bond_distance
  _geom_bond_site_symmetry_2
  _geom_bond_publ_flag
Pt1 N1 2.160(7) . ?
Pt1 P1 2.210(2) . ?
Pt1 Cl1 2.356(2) . ?
Pt1 Se1 2.3563(10) . ?
Se1 C2 1.945(11) . ?
P1 C41 1.796(11) . ?
P1 C21 1.812(10) . ?
P1 C31 1.817(11) . ?
N1 C11 1.456(16) . ?
N1 C1 1.476(12) . ?
N1 C12 1.497(14) . ?
C1 C2 1.483(16) . ?
C21 C22 1.535(16) . ?
C31 C32 1.507(19) . ?
C41 C42 1.525(16) . ?
 
loop_
  _geom_angle_atom_site_label_1
  _geom_angle_atom_site_label_2
  _geom_angle_atom_site_label_3
  _geom_angle
  _geom_angle_site_symmetry_1
  _geom_angle_site_symmetry_3
  _geom_angle_publ_flag
N1 Pt1 P1 175.9(4) . . ?
N1 Pt1 Cl1 92.6(2) . . ?
P1 Pt1 Cl1 87.12(10) . . ?
N1 Pt1 Se1 86.3(2) . . ?
P1 Pt1 Se1 93.86(7) . . ?
Cl1 Pt1 Se1 177.57(11) . . ?
C2 Se1 Pt1 97.0(3) . . ?
C41 P1 C21 103.5(6) . . ?
C41 P1 C31 102.2(5) . . ?
C21 P1 C31 104.2(6) . . ?
C41 P1 Pt1 111.2(5) . . ?
C21 P1 Pt1 118.9(3) . . ?
C31 P1 Pt1 115.0(5) . . ?
C11 N1 C1 110.4(10) . . ?
C11 N1 C12 107.1(9) . . ?
C1 N1 C12 107.6(9) . . ?
C11 N1 Pt1 107.0(7) . . ?
C1 N1 Pt1 111.9(6) . . ?
C12 N1 Pt1 112.7(7) . . ?
N1 C1 C2 113.7(9) . . ?
C1 C2 Se1 108.6(6) . . ?
C22 C21 P1 116.0(8) . . ?
C32 C31 P1 114.9(8) . . ?
C42 C41 P1 113.8(7) . . ?
 
_diffrn_measured_fraction_theta_max    0.862
_diffrn_reflns_theta_full              30.00
_diffrn_measured_fraction_theta_full   0.862
_refine_diff_density_max    1.080
_refine_diff_density_min   -2.054
_refine_diff_density_rms    0.206

#===END
